# Supplementary material
Source: PubMed Central journal article supplement (PMC2773912)
Supplement: supp_180_9_809__1.pdf [file supp_180_9_809__1.pdf]

Title: Effects of Asymptomatic Proximal and Distal Gastroesophageal Reflux on Asthma Severity

Emily DiMango, MD, Janet T. Holbrook, PhD, Erin Simpson, Joan Reibman, MD, Joel Richter, MD, Surinder Narula, Nancy Prusakowski, MS, John G. Mastronarde, Robert A. Wise, MD for the American Lung Association Asthma Clinical Research Centers.

## ONLINE DATA SUPPLEMENT

Table E1

**Cough by proximal or distal pH probe status**

| <b>Mini-AQLQ cough response</b>                         | Positive      | Negative      | P-value |
|---------------------------------------------------------|---------------|---------------|---------|
| N                                                       | 160           | 144           |         |
| Bothered by cough (mean $\pm$ SD)<br>(1-7 $\uparrow$ )* | 4.4 $\pm$ 1.8 | 4.8 $\pm$ 1.8 | 0.06    |
|                                                         |               |               |         |
| <b>Bothered by cough – ASUI (%<br/>of group)</b>        |               |               | 0.41    |
| Not at all                                              | 23            | 25            |         |
| Mild                                                    | 43            | 49            |         |
| Moderate                                                | 29            | 24            |         |
| Severe                                                  | 4             | 2             |         |

\*Lower score correspond to more bothered, e.g, 1= all the time, 7= None of the time

**Cough by proximal pH probe status**

| <b>Mini-AQLQ cough response</b>                           | Positive      | Negative      | P-value |
|-----------------------------------------------------------|---------------|---------------|---------|
| N                                                         | 93            | 149           |         |
| Bothered by cough (1-7 $\uparrow$ ) mean<br>$\pm$ SD - QL | 4.2 $\pm$ 1.9 | 4.7 $\pm$ 1.6 | 0.08    |
|                                                           |               |               |         |
| <b>Bothered by cough – ASUI (%<br/>of group)</b>          |               |               | 0.19    |
| Not at all                                                | 22            | 22            |         |
| Mild                                                      | 41            | 50            |         |
| Moderate                                                  | 31            | 25            |         |
| Severe                                                    | 6             | 2             |         |

**Table E2: Baseline AQLQ and SF36 responses by probe status**

|                                                           | pH probe result             |                                                | P-value <sup>†</sup> |
|-----------------------------------------------------------|-----------------------------|------------------------------------------------|----------------------|
|                                                           | Distal or proximal positive | Distal negative/ Proximal negative or not done |                      |
| <b>Asthma QoL (↑) (score range: 1-7) – N (%)</b>          | 160 (53)                    | 144 (47)                                       |                      |
| Total AQL mean ± SD                                       | 4.4 ± 1.3                   | 4.8 ± 1.2                                      | 0.01                 |
| Symptoms                                                  | 4.4 ± 1.4                   | 4.8 ± 1.2                                      | 0.02                 |
| Activities                                                | 5.1 ± 1.4                   | 5.5 ± 1.2                                      | 0.007                |
| Emotional                                                 | 4.4 ± 1.7                   | 4.8 ± 1.6                                      | 0.05                 |
| Environment                                               | 3.7 ± 1.6                   | 4.0 ± 1.7                                      | 0.17                 |
| <b>SF-36 Quality of Life (↑) (score range: 0-100) – N</b> | 160                         | 143                                            |                      |
| Mean physical score ± SD                                  | 43 ± 10                     | 45 ± 9                                         | 0.06                 |
| Mean emotional score ± SD                                 | 48 ± 11                     | 49 ± 11                                        | 0.55                 |
| Physical functioning                                      | 65 ± 24                     | 69 ± 24                                        | 0.11                 |
| Role physical                                             | 50 ± 42                     | 62 ± 40                                        | 0.01                 |
| Bodily pain                                               | 66 ± 25                     | 70 ± 23                                        | 0.15                 |
| General health                                            | 55 ± 22                     | 56 ± 20                                        | 0.75                 |
| Vitality                                                  | 50 ± 20                     | 52 ± 20                                        | 0.45                 |
| Social functioning                                        | 72 ± 26                     | 77 ± 25                                        | 0.17                 |
| Role emotional                                            | 67 ± 40                     | 70 ± 40                                        | 0.48                 |
| Mental health                                             | 72 ± 20                     | 74 ± 17                                        | 0.68                 |

<sup>†</sup>P-values compare positive on distal or proximal probe result to negative distal result and negative or missing on proximal results based on Wilcoxon Rank Sum tests

**Table E3: Acid exposure time in distal esophagus**

|                                                                                | %Time with distal pH <4 |             |             | P-value†<br>Trend |
|--------------------------------------------------------------------------------|-------------------------|-------------|-------------|-------------------|
|                                                                                | <5.5                    | 5.5-10%     | >10%        |                   |
| <b>pH Probe Classification – N (%)</b>                                         | 199(65)                 | 56 (18)     | 49 (16)     |                   |
| Distal positive                                                                | 10                      | 96          | 100         |                   |
| Proximal positive                                                              | 27                      | 65          | 59          |                   |
| <b>Demographic characteristics</b>                                             |                         |             |             |                   |
| Mean age at randomization, yr ± SD                                             | 42 ± 14                 | 41 ± 13     | 44 ± 12     | 0.48              |
| Males (% of group)                                                             | 30                      | 32          | 37          | 0.38              |
| Race or ethnic group (% of group)                                              |                         |             |             |                   |
| White                                                                          | 50                      | 55          | 45          | 0.88              |
| Black                                                                          | 38                      | 34          | 45          |                   |
| Hispanic                                                                       | 10                      | 7           | 8           |                   |
| Other                                                                          | 2                       | 4           | 2           |                   |
| Former smoker (% of group)                                                     | 17                      | 21          | 18          | 0.67              |
| BMI                                                                            | 32 ± 9                  | 33 ± 7      | 34 ± 8      | 0.19              |
| Obese (BMI≥30)                                                                 | 49                      | 61          | 57          | 0.15              |
| <b>Asthma Characteristics – N</b>                                              | 160                     | 93          | 81          |                   |
| Mean age of asthma onset yr ± SD                                               | 17 ± 17                 | 17 ± 17     | 14 ± 18     | 0.40              |
| Use of inhaled short-acting beta-agonist (MDI/Neb) ≥ 2 times/week (% of group) | 79                      | 79          | 84          | 0.58              |
| Unscheduled health care visit in past year (%)                                 | 58                      | 75          | 55          | 0.72              |
| Oral corticosteroids for asthma in past year (%)                               | 47                      | 64          | 43          | 0.82              |
| Night awakenings due to asthma in past 2 weeks                                 | 13                      | 14          | 20          | 0.18              |
| Daily use of ICS (%)                                                           | 100                     | 100         | 100         |                   |
| Mean ACS (↓) (score range: 0-6) ± SD                                           | 1.9 ± 0.8               | 1.9 ± 0.9   | 1.9 ± 0.9   | 0.57              |
| Mean ASUI (↑) (score range: 0-1) ± SD                                          | 0.76 ± 0.16             | 0.71 ± 0.19 | 0.74 ± 0.18 | 0.26              |
| Mean AQL (↑) (score range: 1-7) ± SD                                           | 4.7 ± 1.2               | 4.3 ± 1.2   | 4.7 ± 1.2   | 0.84              |

|                                                           | %Time with distal pH <4 |             |             | P-value†<br>Trend |
|-----------------------------------------------------------|-------------------------|-------------|-------------|-------------------|
|                                                           | <5.5                    | 5.5-10%     | >10%        |                   |
| <b>SF-36 Quality of Life (↑) (score range: 0-100) – N</b> | 198                     | 124         | 49          |                   |
| Mean physical score ± SD                                  | 44 ± 10                 | 43 ± 10     | 43 ± 10     | 0.29              |
| Mean emotional score ± SD                                 | 48 ± 11                 | 46 ± 11     | 52 ± 9      | 0.20              |
| <b>Mean Pulmonary Function Measures - N</b>               | 199                     | 56          | 49          |                   |
| Pre-BD FEV1 (%predicted ± SD) *                           | 76 ± 14                 | 77 ± 17     | 77 ± 14     | 0.61              |
| Pre-BD FVC (%predicted ± SD) *                            | 87 ± 13                 | 88 ± 15     | 90 ± 13     | 0.33              |
| FEV1 %change post-BD ± SD                                 | 11 ± 10                 | 10 ± 11     | 10 ± 9      | 0.54              |
| FVC %change post-BD ± SD                                  | 6 ± 7                   | 5 ± 8       | 5 ± 9       | 0.60              |
| Peak expiratory flow rate (%predicated ± SD)              | 80 ± 17                 | 79 ± 19     | 77 ± 17     | 0.27              |
| Methacholine contraindicated (% of group)                 | 42                      | 50          | 35          | 0.61              |
| PC <sub>20</sub> mg/mL - N                                | 80                      | 28          | 17          |                   |
| mean ± SD                                                 | 4.1 ± 4.9               | 3.2 ± 4.5   | 3.7 ± 4.1   | 0.53              |
| <b>GERD Symptom Assessment Scale - N</b>                  | 199                     | 56          | 81          |                   |
| Mean number of symptoms (0-15) ± SD                       | 6.6 ± 3.5               | 7.4 ± 3.3   | 8 ± 4       | 0.03              |
| Burning or acid taste (% of group)                        | 53                      | 59          | 61          | 0.23              |
| Mean distress score (↓) (score range: 0-3) ± SD           | 0.55 ± 0.47             | 0.63 ± 0.50 | 0.70 ± 0.52 | 0.10              |
| <b>Other conditions - N</b>                               | 199                     | 56          | 49          |                   |
| Self-reported GERD (% of group)                           | 10                      | 16          | 31          | 0.0003            |
| Eczema (% of group)                                       | 13                      | 16          | 10          | 0.78              |
| Sinusitis (% of group)                                    | 36                      | 41          | 45          | 0.20              |
| Rhinitis (% of group)                                     | 59                      | 66          | 61          | 0.56              |
| Food allergies (% of group)                               | 19                      | 23          | 18          | 0.83              |
| Allergies worsen asthma (% of group)                      | 77                      | 77          | 80          | 0.72              |

KEY: ACS = Asthma Control Score. ASUI = Asthma Symptom Utility Index. AQL = Asthma Quality of Life. ↑ = higher score is better, ↓ = lower score is better, FEV<sub>1</sub> = Forced expiratory volume in 1 second, FVC = Forced vital capacity, BD = bronchodilator, SD = standard deviation, GERD = gastroesophageal reflux disease, SF-36 = RAND 36 item health survey.

\*Predicted values for FEV1 and FVC are taken from: Hankinson JL, Odencrantz JR, Fedan KB. Spirometric reference values from a sample of the general U.S. population. Am J Respir Crit Care Med. 1999;159:179-87.

†P-values are for trend – Cochran-Armitage trend test of categorical variables and linear regression for continuous variables.

**Table E4: Asthma outcomes in relation to acid exposure time in proximal esophagus**

|                                                                                | %Time with distal pH <4 |             |             | P-value†<br>Trend |
|--------------------------------------------------------------------------------|-------------------------|-------------|-------------|-------------------|
|                                                                                | <0.5                    | 0.5-1.0%    | >1.0%       |                   |
| <b>pH Probe Classification – N (%)</b>                                         | 123(51)                 | 51 (21)     | 68 (28)     |                   |
| Distal positive                                                                | 24                      | 33          | 72          |                   |
| Proximal positive                                                              | 1                       | 47          | 100         |                   |
| <b>Demographic characteristics</b>                                             |                         |             |             |                   |
| Mean age at randomization, yr ± SD                                             | 42 ± 14                 | 43 ± 11     | 44 ± 14     | 0.43              |
| Males (% of group)                                                             | 30                      | 29          | 29          | 0.92              |
| Race or ethnic group (% of group)                                              |                         |             |             |                   |
| White                                                                          | 50                      | 41          | 53          | 0.63              |
| Black                                                                          | 38                      | 47          | 37          |                   |
| Hispanic                                                                       | 11                      | 10          | 6           |                   |
| Other                                                                          | 2                       | 2           | 4           |                   |
| Former smoker (% of group)                                                     | 17                      | 20          | 19          | 0.70              |
| BMI                                                                            | 32 ± 8                  | 32 ± 9      | 33 ± 8      | 0.59              |
| Obese (BMI≥30)                                                                 | 54                      | 49          | 53          | 0.86              |
| <b>Asthma Characteristics – N</b>                                              | 123                     | 51          | 68          |                   |
| Mean age of asthma onset yr ± SD                                               | 17 ± 18                 | 14 ± 15     | 16 ± 18     | 0.67              |
| Use of inhaled short-acting beta-agonist (MDI/Neb) ≥ 2 times/week (% of group) | 81                      | 80          | 76          | 0.44              |
| Unscheduled health care visit in past year (%)                                 | 57                      | 67          | 60          | 0.55              |
| Oral corticosteroids for asthma in past year (%)                               | 46                      | 51          | 57          | 0.15              |
| Night awakenings due to asthma in past 2 weeks                                 | 11                      | 14          | 16          | 0.26              |
| Daily use of ICS (%)                                                           | 100                     | 100         | 100         |                   |
| Mean ACS (↓) (score range: 0-6) ± SD                                           | 1.8± 0.7                | 1.8 ± 0.9   | 1.9 ± 0.9   | 0.19              |
| Mean ASUI (↑) (score range: 0-1) ± SD                                          | 0.76 ± 0.16             | 0.74 ± 0.18 | 0.73 ± 0.18 | 0.27              |
| Mean AQL (↑) (score range: 1-7) ± SD                                           | 4.7 ± 1.2               | 4.6 ± 1.4   | 4.4 ± 1.3   | 0.15              |

|                                                           | %Time with distal pH <4 |             |             | P-value†<br>Trend |
|-----------------------------------------------------------|-------------------------|-------------|-------------|-------------------|
|                                                           | <0.5                    | 0.5-1.0%    | >1.0%       |                   |
| <b>SF-36 Quality of Life (↑) (score range: 0-100) – N</b> | 122                     | 51          | 68          |                   |
| Mean physical score ± SD                                  | 46 ± 10                 | 44 ± 9      | 42 ± 9      | 0.02              |
| Mean emotional score ± SD                                 | 48 ± 12                 | 50 ± 10     | 46 ± 11     | 0.27              |
| <b>Mean Pulmonary Function Measures - N</b>               | 123                     | 51          | 68          |                   |
| Pre-BD FEV1 (%predicted ± SD) *                           | 77 ± 14                 | 76 ± 15     | 77 ± 16     | 0.96              |
|                                                           | 88 ± 13                 | 88 ± 12     | 87 ± 17     | 0.68              |
| Pre-BD FVC (%predicted ± SD) *                            |                         |             |             |                   |
| FEV1 %change post-BD ± SD                                 | 10 ± 10                 | 10 ± 10     | 10 ± 10     | 0.55              |
| FVC %change post-BD ± SD                                  | 6 ± 8                   | 6 ± 7       | 4 ± 7       | 0.30              |
| Peak expiratory flow rate (%predicated ± SD)              | 80 ± 17                 | 80 ± 17     | 81 ± 20     | 0.67              |
| Methacholine contraindicated (% of group)                 | 52                      | 61          | 60          | 0.23              |
| PC <sub>20</sub> mg/mL - N                                | 57                      | 19          | 28          | 0.85              |
| mean ± SD                                                 | 3.5 ± 4.6               | 5.1 ± 4.8   | 3.1 ± 4.2   |                   |
| <b>GERD Symptom Assessment Scale - N</b>                  | 123                     | 56          | 81          |                   |
| Mean number of symptoms (0-15) ± SD                       | 6.8 ± 3.5               | 7.2 ± 3.7   | 7.1 ± 3.4   | 0.45              |
| Burning or acid taste (% of group)                        | 55                      | 59          | 56          | 0.89              |
| Mean distress score (↓) (score range: 0-3) ± SD           | 0.56 ± 0.41             | 0.67 ± 0.60 | 0.56 ± 0.38 | 0.67              |
| <b>Other conditions - N</b>                               | 123                     | 51          | 68          |                   |
| Self-reported GERD (% of group)                           | 11                      | 22          | 19          | 0.12              |
| Eczema (% of group)                                       | 15                      | 8           | 16          | 0.95              |
| Sinusitis (% of group)                                    | 41                      | 35          | 44          | 0.73              |
| Rhinitis (% of group)                                     | 64                      | 61          | 62          | 0.70              |
| Food allergies (% of group)                               | 20                      | 20          | 19          | 0.95              |
| Allergies worsen asthma (% of group)                      | 76                      | 78          | 82          | 0.28              |

KEY: ACS = Asthma Control Score. ASUI = Asthma Symptom Utility Index. AQL = Asthma Quality of Life. ↑ = higher score is better, ↓ = lower score is better, FEV<sub>1</sub> = Forced expiratory volume in 1 second, FVC = Forced vital capacity, BD = bronchodilator, SD = standard deviation, GERD = gastroesophageal reflux disease, SF-36 = RAND 36 item health survey.

\*Predicted values for FEV1 and FVC are taken from: Hankinson JL, Odencrantz JR, Fedan KB. Spirometric reference values from a sample of the general U.S. population. Am J Respir Crit Care Med. 1999;159:179-87.

†P-values are for trend – Cochran-Armitage trend test of categorical variables and linear regression for continuous variables.
